# Supplementary material for: Perceptions of and barriers to equitable healthcare access for undocumented populations in Belize: a qualitative study
Source: Research Square preprint supplement (doi:10.21203/rs.3.rs-7502686/v1), 2025-09-12
Supplement: Supplementary file 1 [file f84c207dd3b5c3e88264bf87.docx]

### Supplemental Material

#### COREQ Qualitative Research Checklist

**Domain 1: Research team and reflexivity**

*Personal Characteristics*

1. Interviewer/facilitator Which author/s conducted the interview or focus group? **RY**

2. Credentials What were the researcher’s credentials? E.g. PhD, MD **MD, MPH**

3. Occupation What was their occupation at the time of the study? **Resident Physician**

4. Gender Was the researcher male or female? **Female**

5. Experience and training What experience or training did the researcher have?  **Has conducted prior qualitative studies exploring healthcare access in undocumented individuals in other countries**

*Relationship with participants*

6. Relationship established Was a relationship established prior to study commencement?  **Introduced to participants by CHW or health educator just prior to interview**

7. Participant knowledge of the interviewer What did the participants know about the researcher? e.g. personal goals, reasons for doing the research  **Participants knew that a US-based physician was conducting a research study in collaboration with MoH to identify barriers to health access for undocumented individuals in Belize with the goal of improving health access for these individuals**

8. Interviewer characteristics What characteristics were reported about the interviewer/facilitator? e.g. Bias, assumptions, reasons and interests in the research topic **That the interviewer believes that undocumented individuals will have difficulty accessing health services in the same manner as nationals, that the interviewer believes in equitable access to health care regardless of legal status**

**Domain 2: study design**

*Theoretical framework*

9. Methodological orientation and Theory What methodological orientation was stated to underpin the study? e.g. grounded theory, discourse analysis, ethnography, phenomenology, content analysis  **Grounded theory - developing a theory from data collected through observation and interviews, where the researcher allows the data to guide the development of concepts and relationships rather than starting with a preconceived hypothesis**

*Participant selection*

10. Sampling How were participants selected? e.g. purposive, convenience, consecutive, snowball  **Undocumented participants and Belizean nationals were recruited through respondent-driven sampling. Key informants were recruited through purposive snowball sampling**

11. Method of approach How were participants approached? e.g. face-to-face, telephone, mail, email  **Face to face for majority of participants (56 participants). 4 key informants approached by Whatsapp message or email initially for scheduling of interviews. One interview conducted via Zoom due to scheduling constraints.**

12. Sample size How many participants were in the study? **60**

13. Non-participation How many people refused to participate or dropped out? Reasons? **0**

*Setting*

14. Setting of data collection Where was the data collected? e.g. home, clinic, workplace **Interviews with documented and undocumented individuals were conducted in participant homes, community centers and health posts located within rural villages, and public clinics located in larger villages and cities. Interviews with key informants were conducted in community centers, health posts, healthcare facilities, and offices.**

15. Presence of non-participants Was anyone else present besides the participants and researchers?  **For interviews of documented and undocumented participants, either a community health worker or health educator was present, or both. Assisted with introduction and facilitation of interview and translation if applicable.**

16. Description of sample What are the important characteristics of the sample? e.g. demographic data, date **Village where interview was conducted (workplace location or village of residence), administrative district (Stann Creek or Toledo), interviewee type (documented, undocumented, CHW, health educator, doctor, nurse, MoH, hospital admin), gender, country of origin, ethnicity, languages spoken, reason for lack of documentation, amnesty program applicant, reason for migration to Belize**

*Data collection*

17. Interview guide Were questions, prompts, guides provided by the authors? Was it pilot tested?  **Semi-structured interview guides for documented, undocumented, key informants. There was no predetermined order of questioning, and not all questions were asked to every participant. Interview questions were designed based on pilot studies in other countries exploring health access for vulnerable populations**

18. Repeat interviews Were repeat interviews carried out? If yes, how many? **No**

19. Audio/visual recording Did the research use audio or visual recording to collect the data? **Yes, interviews were audio recorded unless the participant declined**

20. Field notes Were field notes made during and/or after the interview or focus group? **Yes, field notes were taken during interview if participant declined to be recorded. Otherwise field notes were taken after the interview.**

21. Duration What was the duration of the interviews or focus group? **Interview duration affected by need for translation, whether participant had issues accessing healthcare (for documented vs undocumented)**

**CHW (mean 22 min; median 23 min)**

**Health educator (mean 39 min; median 40 min)**

**Administrative officials (mean 50 min; median 47 min)**

**Healthcare worker (mean 22 min; median 21 min)**

**Documented (mean 14 min; median 15 min)**

**Undocumented (mean 19 min; median 16.5 min)**

22. Data saturation Was data saturation discussed? **Yes; Interviews were conducted until thematic saturation was achieved, defined as the point at which no new insights were elicited during subsequent interviews.**

23. Transcripts returned Were transcripts returned to participants for comment and/or correction? **No**

**Domain 3: analysis and findings**

*Data analysis*

24. Number of data coders How many data coders coded the data?  **3**

25. Description of the coding tree Did authors provide a description of the coding tree? **???**

26. Derivation of themes Were themes identified in advance or derived from the data? **Derived from data**

27. Software What software, if applicable, was used to manage the data? **Dedoose**

28. Participant checking Did participants provide feedback on the findings? **No**

*Reporting*

29. Quotations presented Were participant quotations presented to illustrate the themes / findings? Was each quotation identified? e.g. participant number **Yes**

30. Data and findings consistent Was there consistency between the data presented and the findings? **Yes**

31. Clarity of major themes Were major themes clearly presented in the findings? **Yes**

32. Clarity of minor themes Is there a description of diverse cases or discussion of minor themes? **Yes**

#### Interview Questions

**Nationals**

Introductory questions

- What is your ethnic background and primary language?
- Were you born in this village? If not, where is your family from?

Access to medical care

- What health services can you access if you need medical care? Do these services cost money?
- If you needed treatment for a chronic condition such as HTN, diabetes, where would you go and what would the experience be like?
- Where would you go to receive vaccines?
- If you needed treatment for an acute injury, where would you go and what would the experience be like?
- (For females) If you are pregnant and want prenatal care where would you go? Where would you deliver your baby?
- Do you have children? What health services can they use? (preventative care, sick visits)
- Have you received a bill for health services that you received at public hospitals?

Barriers to medical care

- What are the barriers to accessing healthcare for you?
  - What difficulties do you have accessing healthcare **based on where you live?**
- What level of trust do you have in local healthcare services? Healthcare providers?
  - Cultural or religious beliefs on medicine or health within your community that impact how you seek treatment or use health services?
  - Have you experienced any negative patient-provider interactions?
  - What difficulties have you or others you know encountered when navigating the healthcare system?
  - Have you experienced discrimination by ethnicity, socioeconomic, legal status in the healthcare setting or outside the healthcare setting?
- When seeing a doctor, do you feel you are treated differently from other patients? (Discrimination, logistical issues, second class treatment)
- **In order for you and your community to have better health, what do you believe needs to change in the system? Whose responsibility is this?**

**Non-nationals**

Introductory questions

- What is your ethnic background and primary language?
- Were you born in this village? If not, where is your family from?

Access to medical care

- What health services can you access if you need medical care? Do these services cost money?
- If you needed treatment for a chronic condition such as HTN, diabetes, where would you go and what would the experience be like?
- Where would you go to receive vaccines?
- If you needed treatment for an acute injury, where would you go and what would the experience be like?
- (For females) If you are pregnant and want prenatal care where would you go? Where would you deliver your baby?
- Do you have children? What health services can they use? (preventative care, sick visits)
- Have you received a bill for health services that you received at public hospitals?

Barriers to medical care

- What are the barriers to accessing healthcare for you?
  - What difficulties do you have accessing healthcare **based on where you live?**
- What level of trust do you have in local healthcare services? Healthcare providers?
  - Are there cultural or religious beliefs on medicine or health within your community that impact how you seek treatment or use health services?
  - Have you experienced any negative patient-provider interactions?
  - What difficulties have you or others you know encountered when navigating the healthcare system?
  - Have you experienced discrimination by ethnicity, socioeconomic, legal status in the healthcare setting or outside the healthcare setting?
- When seeing a doctor, do you feel you are treated differently from other patients? (Discrimination, logistical issues, second class treatment)
- **In order for you and your community to have better health, what do you believe needs to change in the system? Whose responsibility is this?**

**MoH officials/healthcare worker/community health workers**

Introductory questions

- What is your professional background and current position?
- What is your role at the MoH/as a CHW/at this hospital?
- How many years of experience do you have working in this role?

Healthcare delivery

- Have you ever provided direct medical care to non-Nationals?
  - If so, what was your experience?
  - How were you made aware that the patient was undocumented?
- Tell me about the differences or barriers you face in providing care for Nationals vs non-Nationals
  - Do you take care of non-National children? If so, what kind of care do they have access to? (i.e. vaccines/primary care, sick visits)
- Describe the care an acutely injured non-National patient, such as from a car accident, would receive in a public hospital. In a private hospital?
- Describe the care a chronically ill, such as heart failure, chronic kidney disease, non-National would/may receive in a public hospital. Would this care differ in a private hospital? How so?
- Can non-Nationals receive vaccines in your region?
- Can non-National pregnant women receive obstetric care?

Healthcare access

- What is your knowledge of the health services that those without SSI legally have access to?
- **What are the barriers to accessing healthcare for those without SSI in your region?**
- What is your understanding of the steps required to receive healthcare if you do not have SSI?
- What do you think helps non-Nationals access the healthcare system?
- What do you think helps non-Nationals treat their health emergencies?
- What do you think helps non-Nationals manage their chronic illnesses?
- Any specific reflections or recommendations for how the system could be improved? **In order for your community to have better health, what do you believe needs to change in the system? Whose responsibility is this?**
